# Supplementary material
Source: HighWire-hosted journal article supplement (https://bmjopen.bmj.com/content/14/6/e082093)
Supplement: inline-supplementary-material-2 [file inline-supplementary-material-2.pdf]

## Appendix 2: Semi-structured interview guide

When you reflect on the moment you arrived at the hospital after you/your father/your mother broke your/his/her hip,

- Can you briefly outline the admission process to the hospital?
- Do you remember what they told you about the diagnosis?
- What were the main questions you had at the emergency department?

### Treatment options and decision-making process

- What was explained about the different treatment options?
- How did you experience the decision-making process? Did you feel like you had a choice and could (co-)decide whether to opt for surgery or not?
- Had you/your father/your mother already thought about what they would want if they became seriously ill before being admitted to the hospital?
- What was important for the quality of life of you/your father/your mother?

### Treatment & current functioning

- How did the chosen treatment proceed?
- What was the goal of the chosen treatment?
- Does the course of treatment align with what you had expected beforehand?
- How do you view the choice/decision now?
- What insight would you like to impart to other patients and their loved ones facing the decision of whether to undergo surgery?
